# Supplementary material for: Actin cytoskeleton regulator Arp2/3 complex is required for DLL1 activating Notch1 signaling to maintain the stem cell phenotype of glioma initiating cells
Source: PubMed Central journal article supplement (PMC5464873; doi:10.18632/oncotarget.16495), 2017-03-23
Supplement: oncotarget-08-33353-s001.pdf [file oncotarget-08-33353-s001.pdf]

## Actin cytoskeleton regulator Arp2/3 complex is required for DLL1 activating Notch1 signaling to maintain the stem cell phenotype of glioma initiating cells

### SUPPLEMENTARY MATERIALS

### SUPPLEMENTARY FIGURES AND TABLE

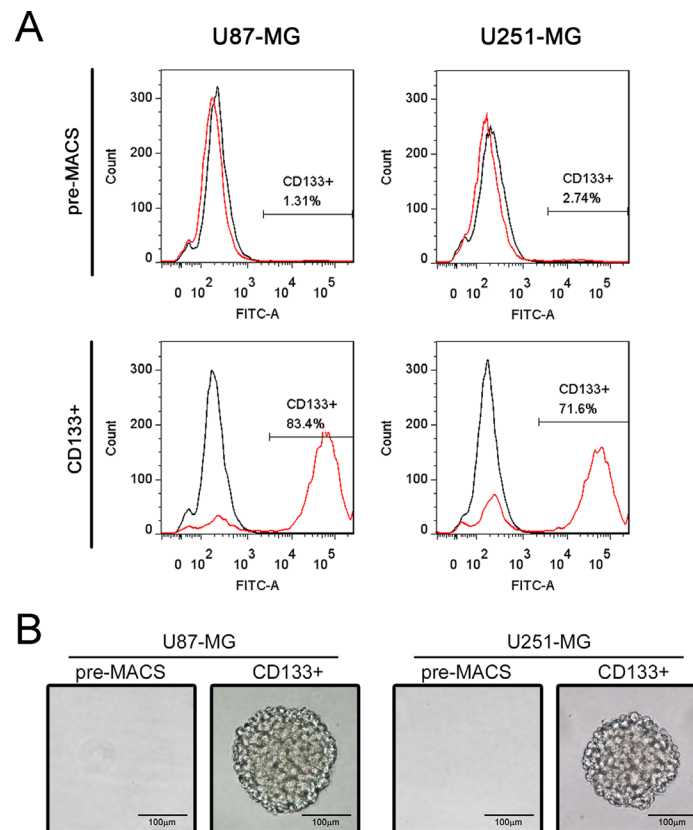

**Supplementary Figure 1: MACS enriched CD133+ glioma neurospheres.** (A) The percentage of CD133+ GBM cells was tested through flow cytometry. Black: negative control. Red: treated cells. (B) Pre-MACS and CD133+ cells were cultured in stem cell medium. Images displayed the CD133+ cells formed neurosphere at day 10.

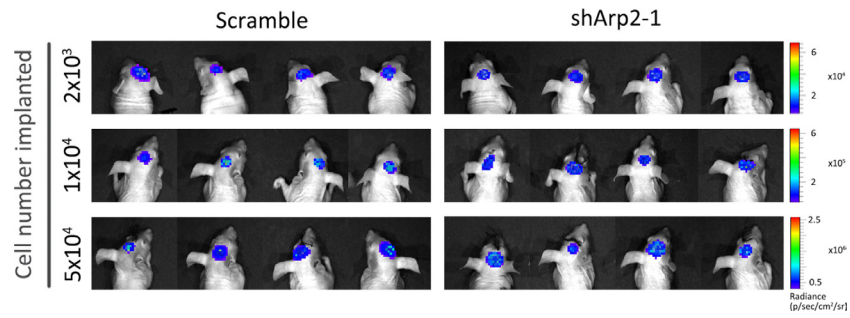

**Supplementary Figure 2: ShArp2 and scramble CD133+ U87-MG neurosphere cells were implanted into the brain of nude mice. Images were captured at 2 days after implantation.**

Supplementary Table 1: Information of primary antibodies used in this study

| Target                        | Manufacturer            | Source | Species reactivity | Dilution for IF | Dilution for Western blot |
|-------------------------------|-------------------------|--------|--------------------|-----------------|---------------------------|
| CD133                         | Abcam<br>#ab19898       | Rabbit | Human              | 1/100           | 1/500                     |
| Nestin                        | Abcam<br>#ab22035       | Mouse  | Human              |                 | 1/1000                    |
| Notch1                        | Abcam<br>#ab52627       | Rabbit | Human              | 1/100           | 1/1000                    |
| NICD1                         | Cell Signaling<br>#4147 | Rabbit | Human              | 1/100           | 1/1000                    |
| HES1                          | Abcam<br>#ab108937      | Rabbit | Human              |                 | 1/10000                   |
| DLL1                          | Abcam<br>#ab57308       | Mouse  | Human              | 1/100           | 1/500                     |
| GFAP                          | Abcam<br>#ab33922       | Rabbit | Human              | 1/100           | 1/1000                    |
| TUJ1                          | Abcam<br>#ab14545       | Mouse  | Human              | 1/100           | 1/2000                    |
| Sodium<br>Potassium<br>ATPase | Abcam<br>#ab76020       | Rabbit | Human              |                 | 1/100000                  |
| $\alpha$ -tubulin             | Abcam #ab7291           | Mouse  | Human              |                 | 1/10000                   |
| $\beta$ -actin                | ZSGB-Bio #TA-<br>09     | Mouse  | Human              |                 | 1/5000                    |

IF: Immunofluorescent staining.
